# Supplementary material for: The WorldWide Antimalarial Resistance Network Clinical Trials Publication Library: A Live, Open-Access Database of Plasmodium Treatment Efficacy Trials
Source: PubMed Central journal article supplement (PMC7356478; doi:10.4269/ajtmh.19-0706), 2020-05-18
Supplement: tpmd190706.SD3.pdf [file tpmd190706.SD3.pdf]

Before 1990

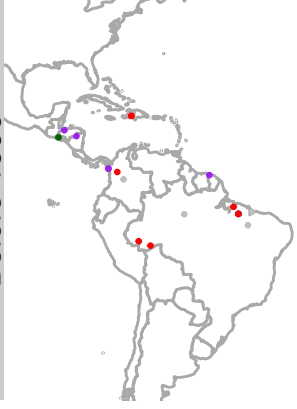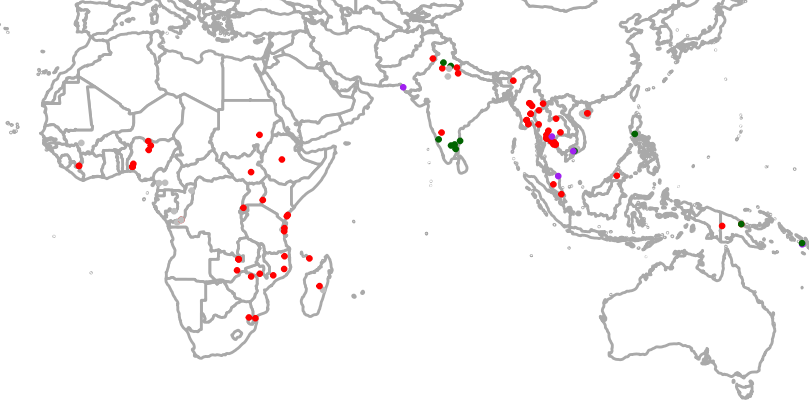

1990s

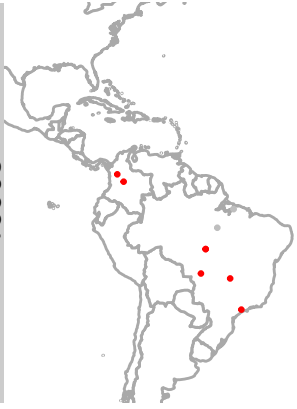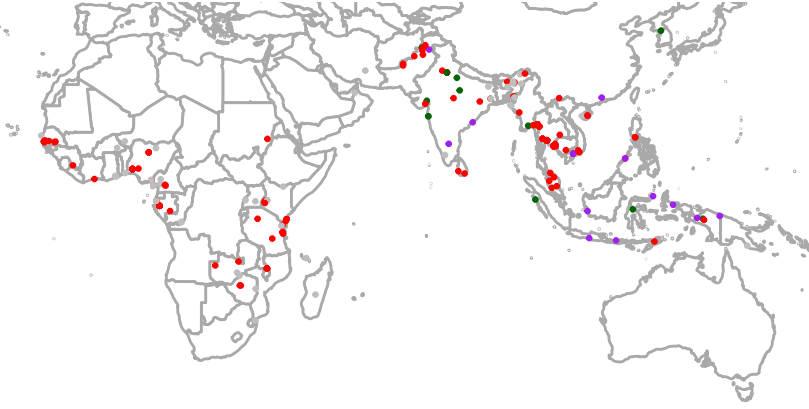

2000s

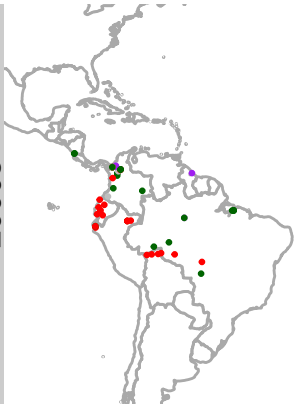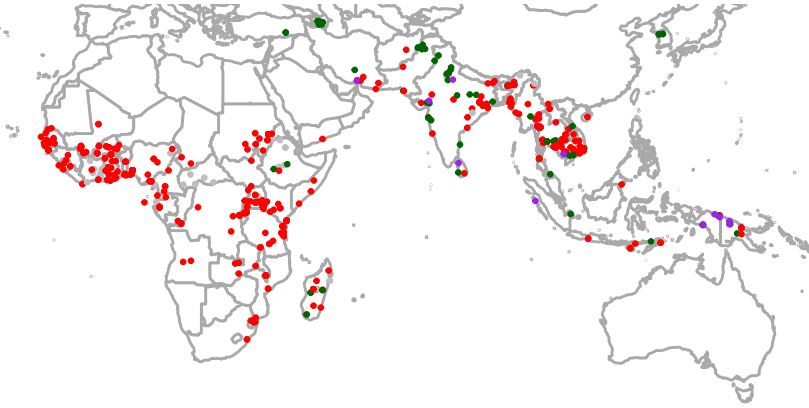

After 2010

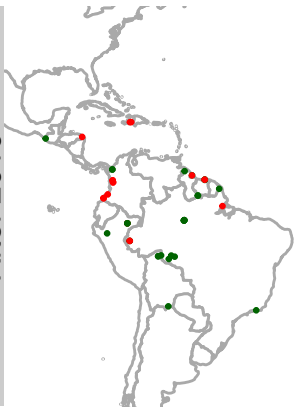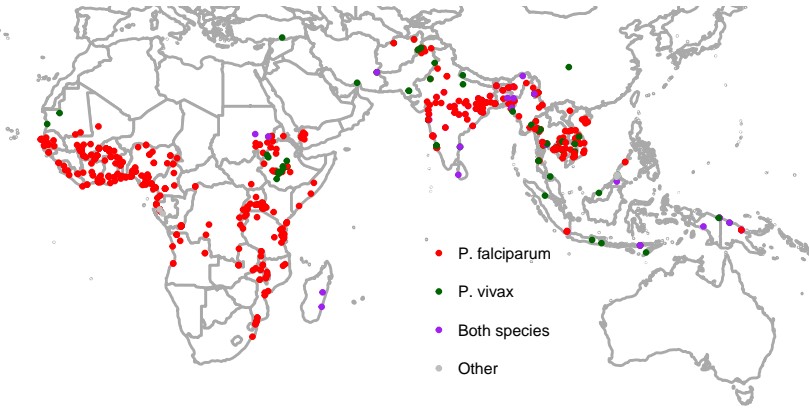

- *P. falciparum*
- *P. vivax*
- Both species
- Other
