# Supplementary material for: The WorldWide Antimalarial Resistance Network Clinical Trials Publication Library: A Live, Open-Access Database of Plasmodium Treatment Efficacy Trials
Source: PubMed Central journal article supplement (PMC7356478; doi:10.4269/ajtmh.19-0706), 2020-05-18

**A***P. falciparum*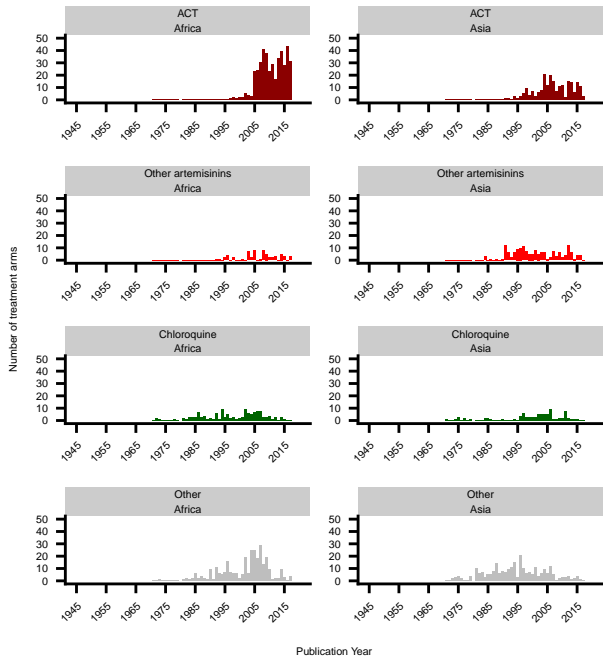

ACT Other artemisinins Chloroquine Other

**B***P. vivax*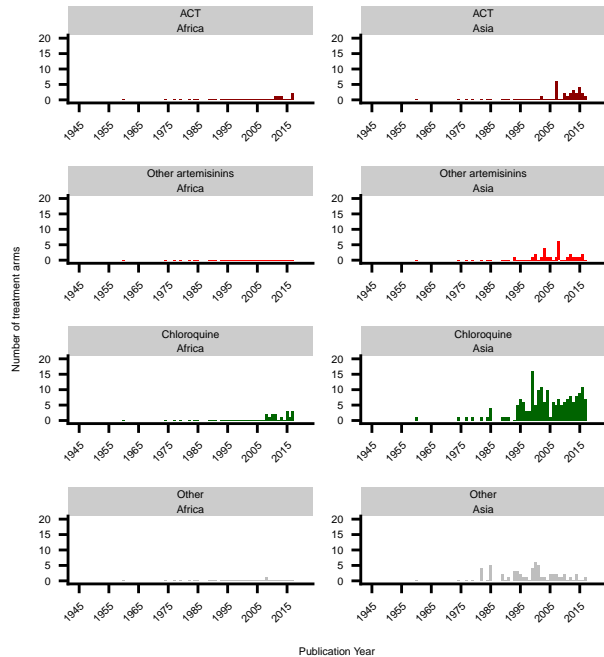

Supplement: tpmd190706.SD4.pdf [file tpmd190706.SD4.pdf]
